# Supplementary material for: Type I Interferon Promotes Antitumor T Cell Response in CRPC by Regulating MDSC
Source: MDPI journal article supplement (doi:10.3390/cancers13215574), 2021-11-08
Supplement: s1 [file s1]

# Supplementary Materials: Type I Interferon Promotes Anti-tumor T Cell Response in CRPC by Regulating MDSC

Lilv Fan, Guiliang Xu, Jingjing Cao, Min Li, Huihui Zhang, Fanlin Li, Xinyue Qi, Xiaoqing Zhang, Zeyu Li, Ping Han and Xuanming Yang

**Table S1.** Primers for RT-qPCR.

| Genes Names    | Primer Sequence         |
|----------------|-------------------------|
| mouse GAPDH F  | AGGTCGGTGTGAACGGATTTG   |
| mouse GAPDH R  | TGTAGACCATGTAGTTGAGGTCA |
| mouse CD80 F   | ACCCCAACATAACTGAGTCT    |
| mouse CD80 R   | TTCCAACCAAGAGAAGCGAGG   |
| mouse CD86 F   | GGTGGCCTTTTGTACACTCTC   |
| mouse CD86 R   | TGAGGTAGAGGTAGGAGGATCTT |
| mouse CD40L F  | TGTCATCTGTGAAAAGGTGGTC  |
| mouse CD40L R  | ACTGGAGCAGCGGTGTTATG    |
| mouse ICOSL F  | TAAAGTGTCCCTGTTTTGTGTCC |
| mouse ICOSL R  | ATTGCACCGACTTCAGTCTCT   |
| mouse IL-7 F   | TTCCTCCACTGATCCTTGTCT   |
| mouse IL-7 R   | AGCAGCTTCCTTTGTATCATCAC |
| mouse IL-15 F  | ACATCCATCTCGTGCTACTTGT  |
| mouse IL-15 R  | GCCTCTGTTTTAGGGAGACCT   |
| mouse LIGHT F  | GTTTCTCCTGAGACTGCATCAA  |
| mouse LIGHT R  | TGGCTCCTGTAAGATGTGCTG   |
| mouse 4-1BBL F | CGGCGCTCCTCAGAGATAC     |
| mouse 4-1BBL R | ATCCCGAACATTAACCGCAGG   |
